# Supplementary material
Source: PubMed Central journal article supplement (PMC4742981)
Supplement: Supp_Table1.pdf [file Supp_Table1.pdf]

## Supplementary Data

SUPPLEMENTARY TABLE S1. ALLELE FREQUENCIES

| <i>SNP</i> | <i>Chromosome</i> | <i>Functional consequence</i> | <i>MAF Hapmap-CHB</i> |
|------------|-------------------|-------------------------------|-----------------------|
| rs12050772 | 15:51252674       | Intron variant                | 0.512                 |
| rs2289105  | 15:51215311       | Intron variant                | 0.573                 |
| rs4774585  | 15:51324283       | 5'flanking region of exon2a   | 0.037                 |

We selected three SNPs of the *CYP19* gene that had a minor allele frequency  $>0.03$ , in the Chinese, using the National Center for Biotechnology Information (NCBI) SNP database ([www.ncbi.nlm.nih.gov/projects/SNP](http://www.ncbi.nlm.nih.gov/projects/SNP)) and taking advantage of prior resequencing data and functional studies.
