# Supplementary material
Source: PubMed Central journal article supplement (PMC4742981)
Supplement: Supp_Table2.pdf [file Supp_Table2.pdf]

SUPPLEMENTARY TABLE S2. SPEARMAN AND Hoeffding CORRELATION BETWEEN VARIABLES AND CORONARY HEART DISEASE

| <i>Variable</i> | <i>Spearman rank of variables</i> | <i>Hoeffding rank of variables</i> | <i>Spearman correlation</i> | <i>Spearman p value</i> | <i>Hoeffding correlation</i> | <i>Hoeffding p value</i> |
|-----------------|-----------------------------------|------------------------------------|-----------------------------|-------------------------|------------------------------|--------------------------|
| HDL             | 1                                 | 1                                  | -0.21621                    | 0.00000                 | 0.008070191                  | 0.00001                  |
| SEX             | 2                                 | 6                                  | -0.19192                    | 0.00000                 | 0.003296058                  | 0.00004                  |
| AGE             | 3                                 | 4                                  | 0.17750                     | 0.00000                 | 0.005061264                  | 0.00001                  |
| Glu             | 4                                 | 3                                  | 0.16477                     | 0.00000                 | 0.005373100                  | 0.00001                  |
| apoB            | 5                                 | 5                                  | -0.14786                    | 0.00000                 | 0.004737472                  | 0.00001                  |
| Fg              | 6                                 | 7                                  | 0.12886                     | 0.00000                 | 0.002371998                  | 0.00045                  |
| EH              | 7                                 | 12                                 | 0.09333                     | 0.00032                 | 0.000302072                  | 0.13101                  |
| RACE            | 8                                 | 13                                 | 0.08622                     | 0.00089                 | 0.000153911                  | 0.21294                  |
| TG              | 9                                 | 10                                 | 0.08525                     | 0.00102                 | 0.000720455                  | 0.03746                  |
| apoA            | 10                                | 2                                  | -0.08506                    | 0.00104                 | 0.005727109                  | 0.00001                  |
| LP(a)           | 11                                | 8                                  | 0.08470                     | 0.00109                 | 0.001021141                  | 0.01614                  |
| PT              | 12                                | 11                                 | 0.07580                     | 0.00349                 | 0.000429779                  | 0.08807                  |
| TP              | 13                                | 14                                 | -0.05438                    | 0.03628                 | 0.000044844                  | 0.31054                  |
| LDL             | 14                                | 9                                  | -0.03862                    | 0.13714                 | 0.000828725                  | 0.02756                  |
| BMI             | 15                                | 15                                 | 0.02178                     | 0.40199                 | -0.000341716                 | 0.98040                  |
| PLT             | 16                                | 16                                 | 0.01567                     | 0.54655                 | -0.000466333                 | 1.00000                  |
| MAGE            | 17                                | 19                                 | 0.01371                     | 0.59783                 | -0.000685990                 | 1.00000                  |
| HB              | 18                                | 17                                 | -0.01032                    | 0.69141                 | -0.000518132                 | 1.00000                  |
| DBP             | 19                                | 18                                 | -0.00397                    | 0.87857                 | -0.000589189                 | 1.00000                  |

$p > 0.5$ .

If either the Spearman  $p$  value or Hoeffding  $p$  value is greater than 0.5, the variable is considered not related to the final variable, coronary heart disease ( $p > 0.5$ ). Therefore, HDL, LDL, Sex, Age, Glu, apoA, apoB, LP(a), PT, TP, FDP, EH, RACE, and TG should be included in multiple logistic regression analyses.
