# Supplementary material
Source: PubMed Central journal article supplement (PMC4742981)
Supplement: Supp_Table3.pdf [file Supp_Table3.pdf]

SUPPLEMENTARY TABLE S3. MULTIPLE LOGISTIC REGRESSION ANALYSES OF THE RELATIONSHIPS BETWEEN THE VARIABLES AND CHD

| <i>Variable</i>   | <i>Test</i>              | <i>ChiSq</i> | <i>ProbChiSq</i> |
|-------------------|--------------------------|--------------|------------------|
| Categorical_age   | Likelihood ratio         | 78.7059      | <0.0001          |
|                   | Score                    | 77.1535      | <0.0001          |
|                   | Wald                     | 73.4980      | <0.0001          |
| Categorical_TG    | Likelihood ratio         | 45.6614      | 0.0253           |
|                   | Score                    | 45.2680      | 0.0277           |
|                   | Wald                     | 44.3095      | 0.0343           |
| Categorical_HDL   | Likelihood ratio         | 106.7197     | <0.0001          |
|                   | Score                    | 103.3709     | <0.0001          |
|                   | Wald                     | 96.7890      | <0.0001          |
| Categorical_LDL   | Likelihood ratio         | 90.9864      | <0.0001          |
|                   | Score                    | 88.0533      | <0.0001          |
|                   | Wald                     | 80.3914      | <0.0001          |
| Categorical_apoA  | Likelihood ratio         | 381.3593     | <0.0001          |
|                   | Score                    | 352.3160     | <0.0001          |
|                   | Wald                     | 275.6331     | <0.0001          |
| Categorical_apoB  | Likelihood ratio         | 381.2923     | <0.0001          |
|                   | Score                    | 345.0423     | <0.0001          |
|                   | Wald                     | 244.9612     | <0.0001          |
| Categorical_LP(a) | Likelihood ratio         | 47.6518      | 0.0160           |
|                   | Score                    | 46.8807      | 0.0191           |
|                   | Wald                     | 45.3734      | 0.0271           |
| Categorical_PT    | Likelihood ratio         | 34.2652      | 0.0339           |
|                   | Score                    | 33.5720      | 0.0402           |
|                   | Wald                     | 32.4564      | 0.0526           |
| Categorical_Fg    | Likelihood ratio         | 46.2952      | 0.0041           |
|                   | Score                    | 45.7184      | 0.0048           |
|                   | Wald                     | 44.4870      | 0.0067           |
| Categorical_Glu   | Likelihood ratio         | 78.6578      | <0.0001          |
|                   | Score                    | 77.1570      | <0.0001          |
|                   | Wald                     | 74.5038      | <0.0001          |
| EH                | Likelihood ratio         | 12.9393      | 0.0003           |
|                   | Score                    | 12.9167      | 0.0003           |
|                   | Wald                     | 12.8783      | 0.0003           |
| Race              | Likelihood ratio         | 11.0412      | 0.0009           |
|                   | Score                    | 11.0250      | 0.0009           |
|                   | Wald                     | 10.9971      | 0.0009           |
| Sex               | Likelihood ratio         | 54.8800      | <0.0001          |
|                   | Score                    | 54.6235      | <0.0001          |
|                   | Wald                     | 53.7569      | <0.0001          |
| Categorical_TP    | Residual Chi-square test | 53.0746      | 0.2900           |

Supplementary Table S3 shows that multiple logistic regression analyses were further done with the variables listed in Supplementary Table S2. Because log odds change linearly as a function of explanatory variables (i.e., the relationship between the logit(P) and the independent variable is assumed to be linear), we segmented the independent variable equidistant over 50 and then replaced the original continuous variables with generated categorical variables. For variables for which  $p < 0.1$ , we used propensity score matching techniques to match the cases and controls (except TP because  $p = 0.29$  in residual Chi-square test, and no effects met the 0.1 significance level for entry into the model). At last, age, race, sex, EH, Glu, TG, HDL, LDL, LP(a), apoA, apoB, PT, and Fg did not differ significantly between those with and without CHD; we next analyzed the interaction between the gene and environment.
