# Supplementary material
Source: PubMed Central journal article supplement (PMC4742981)
Supplement: Supp_Table4.pdf [file Supp_Table4.pdf]

SUPPLEMENTARY TABLE S4. DIFFERENCES  
IN THE CHARACTERISTICS BETWEEN CASES  
AND CONTROLS AFTER PROPENSITY SCORE MATCHING

| <i>Variable</i>   | <i>CHISQ</i> | <i>CHISQ_P</i> |
|-------------------|--------------|----------------|
| Categorical_age   | 6.678        | 1.000          |
| Categorical_TG    | 41.920       | 0.057          |
| Categorical_HDL   | 6.248        | 1.000          |
| Categorical_LDL   | 7.692        | 1.000          |
| Categorical_apoA  | 4.082        | 1.000          |
| Categorical_apoB  | 6.956        | 1.000          |
| Categorical_LP(a) | 32.268       | 0.308          |
| Categorical_PT    | 23.845       | 0.301          |
| Categorical_Fg    | 22.534       | 0.547          |
| Categorical_Glu   | 6.261        | 1.000          |
| EH                | 1.882        | 0.170          |
| Race              | 0.026        | 0.872          |
| Sex               | 0.065        | 0.799          |

*p* values were calculated using  $\chi^2$  test.  
*p* > 0.05.

We used the SAS “pscore” command to generate propensity scores, and the code and output were produced by the “pscore” command as described in the literature (Coca-Perraillon, 2007). This procedure automatically tests for balance between the case and control groups on covariates used to predict the propensity score, and when we controlled the difference in the pscore from 0 to 0.1, our 596 samples (298 controls and 298 CHD patients) remained to the end.

The Chi-square ( $\chi^2$ ) test is used to compare the independent variable (previously segmented) between the case and control after matching (Table S4), and we observed no significant difference (*p* > 0.05).
